# Supplementary material for: The efficacy of vitamin E in reducing non-alcoholic fatty liver disease: a systematic review, meta-analysis, and meta-regression
Source: PubMed Central journal article supplement — Ther Adv Gastroenterol. 2020 Dec 7;13:1756284820974917. doi: 10.1177/1756284820974917 (PMC7724271; doi:10.1177/1756284820974917), 2020-12-07
Supplement: sj-pdf-1-tag-10.1177_1756284820974917.pdf [file sj-pdf-1-tag-10.1177_1756284820974917.pdf]

Quality assessment of RCTs.

| <b>Mosca et al, 2020</b>                                  | <b>Risk of bias</b> | <b>Author judgment</b>                                                                                                                                                                                                                                                                                                                                         |
|-----------------------------------------------------------|---------------------|----------------------------------------------------------------------------------------------------------------------------------------------------------------------------------------------------------------------------------------------------------------------------------------------------------------------------------------------------------------|
| Random sequence generation (selection bias)               | Unclear             | "No mentioning of the method of randomization."                                                                                                                                                                                                                                                                                                                |
| Allocation concealment (selection bias)                   | Unclear             | Not Reported                                                                                                                                                                                                                                                                                                                                                   |
| Blinding of participants and personnel (performance bias) | Low risk            | Double-blinded study.                                                                                                                                                                                                                                                                                                                                          |
| Blinding of outcome assessment (detection bias)           | Low risk            | Double-blinded study.                                                                                                                                                                                                                                                                                                                                          |
| Incomplete outcome data (attrition bias)                  | Unclear             |                                                                                                                                                                                                                                                                                                                                                                |
| Selective reporting (reporting bias)                      | Unclear             |                                                                                                                                                                                                                                                                                                                                                                |
| Other bias                                                | Unclear             |                                                                                                                                                                                                                                                                                                                                                                |
| <b>Khachidze et al. 2019</b>                              | <b>Risk of bias</b> | <b>Author judgment</b>                                                                                                                                                                                                                                                                                                                                         |
| Random sequence generation (selection bias)               | Unclear             | "No mentioning of the method of randomization."                                                                                                                                                                                                                                                                                                                |
| Allocation concealment (selection bias)                   | Unclear             | Not Reported                                                                                                                                                                                                                                                                                                                                                   |
| Blinding of participants and personnel (performance bias) | Unclear             |                                                                                                                                                                                                                                                                                                                                                                |
| Blinding of outcome assessment (detection bias)           | Unclear             |                                                                                                                                                                                                                                                                                                                                                                |
| Incomplete outcome data (attrition bias)                  | Unclear             |                                                                                                                                                                                                                                                                                                                                                                |
| Selective reporting (reporting bias)                      | Unclear             |                                                                                                                                                                                                                                                                                                                                                                |
| Other bias                                                | Unclear             |                                                                                                                                                                                                                                                                                                                                                                |
| <b>Anushiravani et al. 2019</b>                           | <b>Risk of bias</b> | <b>Author judgment</b>                                                                                                                                                                                                                                                                                                                                         |
| Random sequence generation (selection bias)               | Low risk            | Patients were allocated randomly, using a table of random permutations of 20 numbers, into five study groups.                                                                                                                                                                                                                                                  |
| Allocation concealment (selection bias)                   | Low risk            | Study pills were allocated in separate packs blinded and labeled using a four-digit code. The information on which codes correspond to what treatment was maintained by the project coordinator. Apart from the project coordinator, the patients, attending physicians and staff involved in the hepatic clinics were blinded to the intervention allocation. |
| Blinding of participants and personnel (performance bias) | Low risk            | Double-blinded study.                                                                                                                                                                                                                                                                                                                                          |
| Blinding of outcome assessment (detection bias)           | Low risk            | Double-blinded study.                                                                                                                                                                                                                                                                                                                                          |
| Incomplete outcome data (attrition bias)                  | Low risk            | There is no incomplete outcome data                                                                                                                                                                                                                                                                                                                            |
| Selective reporting (reporting bias)                      | Low risk            | Outcomes listed in the methods section are reported in the result section.                                                                                                                                                                                                                                                                                     |

|                                                           |                     |                                                                                                                                                                                                     |
|-----------------------------------------------------------|---------------------|-----------------------------------------------------------------------------------------------------------------------------------------------------------------------------------------------------|
| Other bias                                                | Low risk            | The project was supported financially by the vice chancellor for Research at Shiraz University of Medical Sciences.                                                                                 |
| <b>Bril et al. 2019</b>                                   | <b>Risk of bias</b> | <b>Author judgment</b>                                                                                                                                                                              |
| Random sequence generation (selection bias)               | Low risk            | The computer-generated randomization and patient allocation were performed by the research pharmacist without any stratification and using a block factor of 4, which was unknown to investigators. |
| Allocation concealment (selection bias)                   | Low risk            | The computer-generated randomization and patient allocation were performed by the research pharmacist without any stratification and using a block factor of 4, which was unknown to investigators. |
| Blinding of participants and personnel (performance bias) | Low risk            | Double-blinded study.                                                                                                                                                                               |
| Blinding of outcome assessment (detection bias)           | Low risk            | Double-blinded study.                                                                                                                                                                               |
| Incomplete outcome data (attrition bias)                  | High risk           | Nineteen patients did not complete the 18-month study. In addition, two patients completing 18 months of therapy refused to have a second liver biopsy.                                             |
| Selective reporting (reporting bias)                      | Low risk            | Outcomes listed in the methods section are reported in the result section.                                                                                                                          |
| Other bias                                                | Low risk            | This work was supported by a U.S. Department of Veterans Affairs Merit Award (1 I01 CX000167-01 to K.C.).                                                                                           |
| <b>Zohrer et al. 2017</b>                                 | <b>Risk of bias</b> | <b>Author judgment</b>                                                                                                                                                                              |
| Random sequence generation (selection bias)               | Low risk            | Patients were randomized by computer.                                                                                                                                                               |
| Allocation concealment (selection bias)                   | Low risk            | Patients and investigators were blinded before intervention assignment.                                                                                                                             |
| Blinding of participants and personnel (performance bias) | Low risk            | Patients and investigators were blinded before and after intervention assignment.                                                                                                                   |
| Blinding of outcome assessment (detection bias)           | Low risk            | Patients and investigators were blinded before and after intervention assignment.                                                                                                                   |
| Incomplete outcome data (attrition bias)                  | High risk           | Three patients did not complete the trial.                                                                                                                                                          |
| Selective reporting (reporting bias)                      | Low risk            | Outcomes listed in the methods section are reported in the result section.                                                                                                                          |
| Other bias                                                | Low risk            | VN is supported by the Italian Ministry of Health (Fondi di Ricerca Corrente). Lack of an end-of-study liver biopsy in the placebo group.                                                           |
| <b>Aller et al. 2015</b>                                  | <b>Risk of bias</b> | <b>Author judgment</b>                                                                                                                                                                              |
| Random sequence generation (selection bias)               | Low risk            | All patients were randomized (table of numbers).                                                                                                                                                    |
| Allocation concealment (selection bias)                   | Unclear             | Not reported.                                                                                                                                                                                       |
| Blinding of participants and personnel (performance bias) | Unclear             | Not reported.                                                                                                                                                                                       |
| Blinding of outcome assessment (detection bias)           | Unclear             | Not reported.                                                                                                                                                                                       |
| Incomplete outcome data (attrition bias)                  | Low risk            | Data is recorded for all patients.                                                                                                                                                                  |
| Selective reporting (reporting bias)                      | Low risk            | Outcomes listed in the methods section are reported in the result section.                                                                                                                          |
| Other bias                                                | Unclear             |                                                                                                                                                                                                     |

| <b>Lavine et al. 2011</b>                                 | <b>Risk of bias</b> | <b>Author judgment</b>                                                                                                                                                                                                                                                                                  |
|-----------------------------------------------------------|---------------------|---------------------------------------------------------------------------------------------------------------------------------------------------------------------------------------------------------------------------------------------------------------------------------------------------------|
| Random sequence generation (selection bias)               | Low risk            | Eligible patients were randomized in permuted blocks of treatments stratified by clinical center.                                                                                                                                                                                                       |
| Allocation concealment (selection bias)                   | Unclear             | Not reported.                                                                                                                                                                                                                                                                                           |
| Blinding of participants and personnel (performance bias) | Low risk            | Double-blinded study.                                                                                                                                                                                                                                                                                   |
| Blinding of outcome assessment (detection bias)           | Low risk            | Double-blinded study.                                                                                                                                                                                                                                                                                   |
| Incomplete outcome data (attrition bias)                  | High risk           | Four patient were lost to follow-up and seven withdraw from study.                                                                                                                                                                                                                                      |
| Selective reporting (reporting bias)                      | Low risk            | Outcomes listed in the methods section are reported in the result section.                                                                                                                                                                                                                              |
| Other bias                                                | Low risk            | The study is supported by the National Institute of Diabetes and Digestive and Kidney Diseases grants.<br>This study was supported in part by the Intramural Research Program of the National Cancer institute and the Eunice Kennedy Shriver National Institute of Child Health and Human Development. |
| <b>Sanyal et al. 2010</b>                                 | <b>Risk of bias</b> | <b>Author judgment</b>                                                                                                                                                                                                                                                                                  |
| Random sequence generation (selection bias)               | Unclear             | "No mentioning of the method of randomization."                                                                                                                                                                                                                                                         |
| Allocation concealment (selection bias)                   | Unclear             | Not reported.                                                                                                                                                                                                                                                                                           |
| Blinding of participants and personnel (performance bias) | Low risk            | Double-blinded study.                                                                                                                                                                                                                                                                                   |
| Blinding of outcome assessment (detection bias)           | Low risk            | Double-blinded study.                                                                                                                                                                                                                                                                                   |
| Incomplete outcome data (attrition bias)                  | High risk           | Many patients were lost to follow up or withdraw from the study.                                                                                                                                                                                                                                        |
| Selective reporting (reporting bias)                      | Low risk            | All pre specified outcomes were reported.                                                                                                                                                                                                                                                               |
| Other bias                                                | Low risk            | The study is Financially supported by the National Institute of Diabetes and Digestive and Kidney Diseases grants.                                                                                                                                                                                      |
| <b>Balmer et al. 2009</b>                                 | <b>Risk of bias</b> | <b>Author judgment</b>                                                                                                                                                                                                                                                                                  |
| Random sequence generation (selection bias)               | Unclear             | "No mentioning of the method of randomization."                                                                                                                                                                                                                                                         |
| Allocation concealment (selection bias)                   | Low risk            | The patients as well as the physicians were blinded to the treatment until completion of the whole study.                                                                                                                                                                                               |
| Blinding of participants and personnel (performance bias) | Low risk            | The patients as well as the physicians were blinded to the treatment until completion of the whole study.                                                                                                                                                                                               |
| Blinding of outcome assessment (detection bias)           | Low risk            | The patients as well as the physicians were blinded to the treatment until completion of the whole study.                                                                                                                                                                                               |
| Incomplete outcome data (attrition bias)                  | Unclear             |                                                                                                                                                                                                                                                                                                         |
| Selective reporting (reporting bias)                      | Low risk            | Outcomes listed in the methods section are reported in the result section.                                                                                                                                                                                                                              |
| Other bias                                                | High risk           | Falk Pharma provided support to buy the ELISA kits and M. L. Balmer was supported by the Stiftung f"ur die Leberkrankheiten.                                                                                                                                                                            |
| <b>Wang et al. 2008</b>                                   | <b>Risk of bias</b> | <b>Author judgment</b>                                                                                                                                                                                                                                                                                  |

|                                                           |                     |                                                                                                                                                                                                |
|-----------------------------------------------------------|---------------------|------------------------------------------------------------------------------------------------------------------------------------------------------------------------------------------------|
| Random sequence generation (selection bias)               | Unclear             | "No mentioning of the method of randomization."                                                                                                                                                |
| Allocation concealment (selection bias)                   | Unclear             | Not reported.                                                                                                                                                                                  |
| Blinding of participants and personnel (performance bias) | High risk           | Single-blind study                                                                                                                                                                             |
| Blinding of outcome assessment (detection bias)           | Low risk            | Single-blind study                                                                                                                                                                             |
| Incomplete outcome data (attrition bias)                  | Low risk            | No missing data points.                                                                                                                                                                        |
| Selective reporting (reporting bias)                      | Low risk            | Outcomes listed in the methods section are reported in the result section.                                                                                                                     |
| Other bias                                                | Unclear             |                                                                                                                                                                                                |
| <b>Nobili et al. 2008</b>                                 | <b>Risk of bias</b> | <b>Author judgment</b>                                                                                                                                                                         |
| Random sequence generation (selection bias)               | Low risk            | A computer-generated randomization sequence assigned participants in a 1:1 ratio.                                                                                                              |
| Allocation concealment (selection bias)                   | Low risk            | A statistician, who was blinded to participants' clinical data and did not participate in patients' clinical care, generated the allocation sequence and assigned participants to their group. |
| Blinding of participants and personnel (performance bias) | High risk           | Participants and investigators were blinded to drug treatment assignments for the first 12 months, and then the study continued in an open-label fashion for an additional 12 months.          |
| Blinding of outcome assessment (detection bias)           | High risk           | Participants and investigators were blinded to drug treatment assignments for the first 12 months, and then the study continued in an open-label fashion for an additional 12 months.          |
| Incomplete outcome data (attrition bias)                  | High risk           | Two patients had withdrawn from the study in the first 12 months.<br>Two patients were lost to follow-up in the second 12 month.                                                               |
| Selective reporting (reporting bias)                      | Low risk            | Outcomes listed in the methods section are reported in the result section.                                                                                                                     |
| Other bias                                                | Unclear             |                                                                                                                                                                                                |
| <b>Nobili et al. 2006</b>                                 | <b>Risk of bias</b> | <b>Author judgment</b>                                                                                                                                                                         |
| Random sequence generation (selection bias)               | Unclear             | "No mentioning of the method of randomization."                                                                                                                                                |
| Allocation concealment (selection bias)                   | Unclear             | Not Reported                                                                                                                                                                                   |
| Blinding of participants and personnel (performance bias) | low risk            | Double-blind placebo study.                                                                                                                                                                    |
| Blinding of outcome assessment (detection bias)           | low risk            | Double-blind placebo study.                                                                                                                                                                    |
| Incomplete outcome data (attrition bias)                  | High risk           | Two patients were lost to the follow-up and not included in the analysis.                                                                                                                      |
| Selective reporting (reporting bias)                      | Low risk            | All prespecified outcomes were reported.                                                                                                                                                       |
| Other bias                                                | Unclear             |                                                                                                                                                                                                |
| <b>Dufour et al. 2006</b>                                 | <b>Risk of bias</b> | <b>Author judgment</b>                                                                                                                                                                         |
| Random sequence generation (selection bias)               | low risk            | "No mentioning of the method of randomization."                                                                                                                                                |
| Allocation concealment (selection bias)                   | Unclear             | Not Reported                                                                                                                                                                                   |
| Blinding of participants and personnel                    | low risk            | Double-blind placebo study.                                                                                                                                                                    |

|                                                           |                     |                                                                                                                                                                                                                                                     |
|-----------------------------------------------------------|---------------------|-----------------------------------------------------------------------------------------------------------------------------------------------------------------------------------------------------------------------------------------------------|
| (performance bias)                                        |                     |                                                                                                                                                                                                                                                     |
| Blinding of outcome assessment (detection bias)           | low risk            | Double-blind placebo study.                                                                                                                                                                                                                         |
| Incomplete outcome data (attrition bias)                  | Unclear             |                                                                                                                                                                                                                                                     |
| Selective reporting (reporting bias)                      | Low risk            | Outcomes listed in the methods section are reported in the result section.                                                                                                                                                                          |
| Other bias                                                | Unclear             |                                                                                                                                                                                                                                                     |
| <b>Vajro et al. 2004</b>                                  | <b>Risk of bias</b> | <b>Author judgment</b>                                                                                                                                                                                                                              |
| Random sequence generation (selection bias)               | Unclear             | "No mentioning of the method of randomization."                                                                                                                                                                                                     |
| Allocation concealment (selection bias)                   | Low risk            | Patients were randomly allocated to two single-blind groups.                                                                                                                                                                                        |
| Blinding of participants and personnel (performance bias) | Low risk            | Single-blind study.                                                                                                                                                                                                                                 |
| Blinding of outcome assessment (detection bias)           | High risk           | Single-blind study.                                                                                                                                                                                                                                 |
| Incomplete outcome data (attrition bias)                  | Low risk            | No missing data points.                                                                                                                                                                                                                             |
| Selective reporting (reporting bias)                      | Low risk            | All prespecified outcomes were reported.                                                                                                                                                                                                            |
| Other bias                                                | Unclear             |                                                                                                                                                                                                                                                     |
| <b>Harrison et al. 2003</b>                               | <b>Risk of bias</b> | <b>Author judgment</b>                                                                                                                                                                                                                              |
| Random sequence generation (selection bias)               | Low risk            | Patient were randomized according to a computer-generated randomization table.                                                                                                                                                                      |
| Allocation concealment (selection bias)                   | Low risk            | The patients were assigned to either the vitamin group or the placebo group, based on the coded randomization table, so that only the pharmacist knew which intervention the patient was receiving.                                                 |
| Blinding of participants and personnel (performance bias) | Low risk            | Double-blind, placebo-controlled trial.                                                                                                                                                                                                             |
| Blinding of outcome assessment (detection bias)           | Low risk            | Both the principal investigator and pathologist were blinded as to the patient's intervention.                                                                                                                                                      |
| Incomplete outcome data (attrition bias)                  | High risk           | Four patients did not complete the study, two in each group. Three of the four patients did not wish to have follow-up liver biopsies, and one patient moved away before completion of the study. These patients were not included in the analysis. |
| Selective reporting (reporting bias)                      | Low risk            | All prespecified outcomes were reported.                                                                                                                                                                                                            |
| Other bias                                                | Unclear             |                                                                                                                                                                                                                                                     |
