# Supplementary material for: The efficacy of vitamin E in reducing non-alcoholic fatty liver disease: a systematic review, meta-analysis, and meta-regression
Source: PubMed Central journal article supplement — Ther Adv Gastroenterol. 2020 Dec 7;13:1756284820974917. doi: 10.1177/1756284820974917 (PMC7724271; doi:10.1177/1756284820974917), 2020-12-07
Supplement: sj-pdf-2-tag-10.1177_1756284820974917.pdf [file sj-pdf-2-tag-10.1177_1756284820974917.pdf]

Table 2 shows the baseline data of patients in included studies.

| Author, Year                       | Treatment              |        |             |            |                                               | Sex (male) | Age (years) | Anthropometric           |              |             | Metabolic and Biochemical |              |             |              |                |              |             |             | Liver histology |             |                 |                  |                |                      |                     |    |
|------------------------------------|------------------------|--------|-------------|------------|-----------------------------------------------|------------|-------------|--------------------------|--------------|-------------|---------------------------|--------------|-------------|--------------|----------------|--------------|-------------|-------------|-----------------|-------------|-----------------|------------------|----------------|----------------------|---------------------|----|
|                                    | Intervention           | Number | Dosage      | Frequency  | Co-Intervention                               |            |             | BMI (kg/m <sup>2</sup> ) | WC (cm)      | Weight (kg) | TG (mg/dl)                | TC (mg/dl)   | HDL (mg/dl) | LDL (mg/dl)  | FBS (mg/dl)    | FPI (μU/mL)  | HOMA-IR     | AST (U/ml)  | ALT (U/ml)      | NAS         | Steatosis grade | Ballooning grade | Fibrosis stage | Lobular Inflammation | Portal Inflammation |    |
| Mosca et al, 2020 [Italy]          | vitamin E              | 40     | —           | —          | Hydroxytyrosol                                | NA         | NA          | NA                       | NA           | NA          | NA                        | NA           | NA          | NA           | NA             | NA           | NA          | NA          | NA              | NA          | NA              | NA               | NA             | NA                   |                     |    |
|                                    | Placebo                | 40     | —           | —          | None                                          | NA         | NA          | NA                       | NA           | NA          | NA                        | NA           | NA          | NA           | NA             | NA           | NA          | NA          | NA              | NA          | NA              | NA               | NA             | NA                   |                     |    |
| Khachidze et al. 2019 [Georgia]    | vitamin E              | 52     | 400 IU      | Once daily | vitamin C 500 mg/day + lifestyle modification | NA         | NA          | NA                       | NA           | NA          | NA                        | NA           | NA          | NA           | NA             | NA           | NA          | NA          | NA              | NA          | NA              | NA               | NA             | NA                   |                     |    |
|                                    | lifestyle modification | 20     | —           | —          | None                                          | NA         | NA          | NA                       | NA           | NA          | NA                        | NA           | NA          | NA           | NA             | NA           | NA          | NA          | NA              | NA          | NA              | NA               | NA             | NA                   |                     |    |
|                                    | UDCA                   | 35     | 15 mg/kg    | Once daily | lifestyle modification                        | NA         | NA          | NA                       | NA           | NA          | NA                        | NA           | NA          | NA           | NA             | NA           | NA          | NA          | NA              | NA          | NA              | NA               | NA             | NA                   |                     |    |
| Anushiravani et al. 2019 [Iran]    | vitamin E              | 30     | 400 IU      | Once daily | lifestyle                                     | NA         | 47.0 ± 9.1  | 25.7 ± 3.3               | 90.9 ± 9.6   | NA          | 154.2 ± 58.9              | 190.1 ± 43.6 | 53.2 ± 11.5 | 106 ± 38.9   | 101.1 ± 15.4   | NA           | NA          | 25.1 ± 9.1  | 30.7 ± 18.2     | NA          | NA              | NA               | NA             | NA                   | NA                  |    |
|                                    | Placebo                | 30     | —           | —          | lifestyle                                     | NA         |             | 26.1 ± 3.1               | 92.8 ± 8.9   | NA          | 150.2 ± 54.2              | 219.6 ± 55.4 | 58.4 ± 8.6  | 131.2 ± 48.8 | 107.7 ± 29.2   | NA           | NA          | 19.6 ± 11.7 | 22.8 ± 15.9     | NA          | NA              | NA               | NA             | NA                   | NA                  | NA |
|                                    | Metformin              | 30     | 500 mg      | Once daily | lifestyle                                     | NA         |             | 26.1 ± 3.5               | 93.3 ± 9.1   | NA          | 160.2 ± 50.7              | 198.4 ± 47.8 | 60.3 ± 15.1 | 106.1 ± 39.3 | 100.7 ± 16.1   | NA           | NA          | 19.4 ± 7.8  | 23.3 ± 14.2     | NA          | NA              | NA               | NA             | NA                   | NA                  | NA |
|                                    | Silymarin              | 30     | 140 mg      | Once daily | lifestyle                                     | NA         |             | 25.1 ± 3.7               | 90.6 ± 10.5  | NA          | 155.1 ± 83.7              | 193.2 ± 39.9 | 48.5 ± 9.1  | 113.7 ± 34.3 | 118.9 ± 56.4   | NA           | NA          | 23.3 ± 11.1 | 30.2 ± 18.1     | NA          | NA              | NA               | NA             | NA                   | NA                  | NA |
|                                    | pioglitazone           | 30     | 15 mg       | Once daily | lifestyle                                     | NA         |             | 25 ± 3.3                 | 90.4 ± 9.8   | NA          | 125.6 ± 67.2              | 185.1 ± 45.3 | 63.3 ± 15.1 | 96.6 ± 35.4  | 100.4 ± 9.4    | NA           | NA          | 28.4 ± 13.6 | 42.3 ± 22.6     | NA          | NA              | NA               | NA             | NA                   | NA                  | NA |
| Bril et al. 2019 [United States]   | vitamin E              | 36     | 400 IU      | twice day  | None                                          | 33         | 60 ± 9      | 33.8 ± 4.6               | NA           | NA          | 156 (126–210) *           | 174 ± 44     | 39 ± 9      | 98 ± 39      | 158 ± 41       | 22 ± 14      | NA          | 41 ± 22     | 53 ± 32         | 3.9 ± 1.6   | 1.7 ± 0.8       | 0.9 ± 0.8        | 1.6 ± 1.2      | NA                   | NA                  |    |
|                                    | Placebo                | 32     | —           | —          | None                                          | 30         | 57 ± 11     | 33.6 ± 4.0               | NA           | NA          | 154 (117–255) *           | 171 ± 40     | 39 ± 10     | 94 ± 33      | 153 ± 37       | 18 ± 13      | NA          | 40 ± 23     | 53 ± 33         | 4.2 ± 1.6   | 1.8 ± 0.7       | 0.9 ± 0.8        | 1.5 ± 1.0      | NA                   | NA                  |    |
|                                    | vitamin E              | 37     | 400 IU      | twice day  | pioglitazone 45 mg/day                        | 30         | 60 ± 6      | 35.2 ± 4.3               | NA           | NA          | 163 (108–274) *           | 170 ± 53     | 38 ± 10     | 91 ± 44      | 144 ± 43       | 16 ± 10      | NA          | 32 ± 18     | 40 ± 25         | 3.7 ± 1.3   | 1.6 ± 0.8       | 0.7 ± 0.6        | 1.4 ± 1.1      | NA                   | NA                  |    |
| Zohrer et al. 2017 [Italy]         | vitamin E              | 20     | 39 IU       | Once daily | choline 201 mg + DHA 250 mg                   | 14         | 13.2 ± 2.3  | 27.6 ± 4.0               | 86.7 ± 10.3  | 68.0 ± 18.7 | 101.2 ± 51.3              | 150.1 ± 31.5 | 47.3 ± 7.9  | 84.0 ± 29.4  | 85.40 ± 7.5    | 21.9 ± 14.4  | 4.6 ± 3.1   | 36.2 ± 13.0 | 53.5 ± 32.6     | 4.35 ± 1.10 | 1.85 ± 0.72     | 1.35 ± 0.57      | 2.00 ± 0.80    | 1.15 ± 0.48          | 1.35 ± 0.48         |    |
|                                    | Placebo                | 20     | —           | —          | None                                          | 10         | 13.2 ± 2.1  | 28.3 ± 5.3               | 89.9 ± 9.7   | 66.3 ± 15.1 | 87.2 ± 46.2               | 154.5 ± 30.1 | 46.6 ± 8.3  | 100.8 ± 37.6 | 82.5 ± 7.2     | 22.3 ± 14.4  | 4.5 ± 3.0   | 33.1 ± 18.3 | 51.2 ± 51.6     | NA          | NA              | NA               | NA             | NA                   | NA                  |    |
| Aller et al. 2015 [Spain]          | vitamin E              | 18     | 80 IU       | Once daily | silymarin + hypocaloric diet + exercise       | 22         | 47.4 ± 11.2 | 36.8 ± 7.9               | 102.6 ± 10.2 | 91.6 ± 14   | 189.6 ± 84                | NA           | NA          | NA           | 93.1 ± 13      | NA           | 3.4 ± 2.2   | 35.6 ± 16   | 56.4 ± 27       | -1.6 ± 1.8  | NA              | NA               | NA             | NA                   | NA                  |    |
|                                    | hypocaloric diet       | 18     | —           | —          | None                                          |            |             | 35 ± 7.4                 | 103.7 ± 13   | 92.2 ± 13   | 180.8 ± 68                | NA           | NA          | NA           | 129.9 ± 46     | NA           | 5.4 ± 4.1   | 41.6 ± 20   | 70.8 ± 41       | -1 ± 1.9    | NA              | NA               | NA             | NA                   | NA                  |    |
| Lavine et al. 2011 [United States] | vitamin E              | 58     | 800 IU      | Once daily | diet + exercise                               | 47         | 13.4 ± 2.3  | 34 ± 7                   | 108 ± 18     | 91 ± 28     | 154 ± 107                 | 179 ± 42     | 37 ± 9      | 114 ± 34     | 87 ± 8         | NA           | 8.6 ± 7.8   | 70 ± 37     | 121 ± 65        | 4.8 ± 1.6   | 2.3 ± 0.8       | 1.0 ± 0.8        | 1.2 ± 1.0      | 1.6 ± 0.6            | NA                  |    |
|                                    | placebo                | 58     | —           | —          | diet + exercise                               | 52         | 12.9 ± 2.6  | 33 ± 6                   | 105 ± 12     | 86 ± 24     | 153 ± 92                  | 176 ± 35     | 38 ± 10     | 108 ± 27     | 90 ± 9         | NA           | 11.0 ± 17.6 | 74 ± 42     | 126 ± 62        | 4.6 ± 1.3   | 2.1 ± 0.8       | 0.8 ± 0.8        | 1.2 ± 1.0      | 1.7 ± 0.6            | NA                  |    |
|                                    | metformin              | 57     | 1000 mg     | —          | diet + exercise                               | 47         | 13.1 ± 2.4  | 34 ± 5                   | 104 ± 13     | 88 ± 23     | 151 ± 103                 | 174 ± 45     | 38 ± 7      | 105 ± 30     | 90 ± 10        | NA           | 7.9 ± 5.4   | 69 ± 45     | 121 ± 68        | 4.5 ± 1.2   | 2.1 ± 0.8       | 0.8 ± 0.8        | 1.3 ± 1.0      | 1.6 ± 0.6            | NA                  |    |
| Sanyal et al. 2010 [United States] | vitamin E              | 84     | 800 IU      | Once daily | None                                          | 32         | 46.6 ± 12.1 | 34 ± 7                   | 107 ± 15     | 84 ± 24     | 166 ± 104                 | 195 ± 40     | 44 ± 13     | 119 ± 35     | 95 ± 14        | NA           | 5.2 ± 4.0   | 59 ± 33     | 86 ± 52         | 5.1 ± 1.4   | 1.9 ± 0.9       | 1.3 v 0.8        | 1.5 ± 1.0      | 1.8 ± 0.7            | NA                  |    |
|                                    | placebo                | 83     | —           | Once daily | None                                          | 34         | 45.4 ± 11.2 | 35 ± 7                   | 109 ± 14     | 99 ± 21     | 165 ± 89                  | 199 ± 40     | 43 ± 11     | 125 ± 35     | 95 ± 14        | NA           | 5.5 ± 5.1   | 55 ± 30     | 81 ± 48         | 4.8 ± 1.4   | 1.9 ± 0.8       | 1.3 ± 0.7        | 1.6 ± 1.1      | 1.6 ± 0.7            | NA                  |    |
|                                    | pioglitazone           | 80     | 30 mg       | Once daily | None                                          | 33         | 47.0 ± 12.6 | 34 ± 6                   | 108 ± 14     | 97 ± 23     | 162 ± 84                  | 195 ± 37     | 45 ± 12     | 120 ± 31     | 92 ± 12        | NA           | 5.0 ± 3.8   | 54 ± 26     | 82 ± 45         | 5.0 ± 1.4   | 2.0 ± 0.8       | 1.1 ± 0.8        | 1.4 ± 0.9      | 1.8 ± 0.7            | NA                  |    |
| Balmer et al. 2009 [Switzerland]   | vitamin E              | 14     | 400 IU      | twice day  | UDCA 12–15 mg/kg/day                          | 9          | 47 ± 14     | 31 ± 7                   | NA           | NA          | NA                        | NA           | NA          | NA           | 6.17 ± 1.68 ** | 35.4 ± 68.32 | 8.2 ± 12.9  | NA          | NA              | NA          | 2.6 ± 1.2       | NA               | NA             | NA                   | NA                  |    |
|                                    | placebo                | 13     | —           | —          | None                                          | 7          | 46 ± 13     | 31 ± 5                   | NA           | NA          | NA                        | NA           | NA          | NA           | 5.81 ± 1.88 ** | 33.3 ± 7.89  | 10.7 ± 2.7  | NA          | NA              | NA          | 2.9 ± 0.7       | NA               | NA             | NA                   | NA                  |    |
|                                    | UDCA                   | 14     | 12–15 mg/kg | Once daily | None                                          | 8          | 47 ± 12     | 30 ± 5                   | NA           | NA          | NA                        | NA           | NA          | NA           | 7.19 ± 4.76 ** | 15.9 ± 10.4  | 4.6 ± 3.4   | NA          | NA              | NA          | 3.0 ± 0.9       | NA               | NA             | NA                   | NA                  |    |

|                                             |                        |    |                   |            |                                                        |    |                   |                    |    |               |                |                 |    |    |                |                    |                    |               |                |           |           |           |           |           |           |    |
|---------------------------------------------|------------------------|----|-------------------|------------|--------------------------------------------------------|----|-------------------|--------------------|----|---------------|----------------|-----------------|----|----|----------------|--------------------|--------------------|---------------|----------------|-----------|-----------|-----------|-----------|-----------|-----------|----|
| <b>Wang et al. 2008 [China]</b>             | vitamin E              | 19 | 150 IU            | Once daily | None                                                   | 13 | 13.4 ± 1.6        | 29.36 ± 3.11       | NA | NA            | 1.51 ± 0.33 ** | 4.61 ± 1.03 **  | NA | NA | 4.22 ± 0.43 ** | 15.42 ± 1.10       | 2.89 ± 0.32        | 78.55 ± 23.11 | 139.98 ± 19.82 | NA        | NA        | NA        | NA        | NA        | NA        |    |
|                                             | lifestyle intervention | 19 | —                 | —          | None                                                   | 13 | 13.4 ± 2.5        | 29.61 ± 1.48       | NA | NA            | 1.38 ± 0.38 ** | 4.82 ± 0.91 **  | NA | NA | 4.15 ± 0.39 ** | 15.54 ± 4.50       | 2.87 ± 0.88        | 93.26 ± 38.94 | 152.26 ± 49.30 | NA        | NA        | NA        | NA        | NA        | NA        |    |
|                                             | no intervention        | 38 | —                 | —          | None                                                   | 26 | 14.04 ± 1.8       | 29.81 ± 2.41       | NA | NA            | 1.44 ± 0.35 ** | 4.70 ± 1.18 **  | NA | NA | 4.26 ± 0.42 ** | 15.50 ± 2.10       | 2.93 ± 0.44        | 86.63 ± 21.54 | 144.77 ± 26.73 | NA        | NA        | NA        | NA        | NA        | NA        |    |
| <b>Nobili et al. 2008 [Italy]</b>           | vitamin E              | 25 | 600 IU            | Once daily | ascorbic acid 500 mg/day + low-calorie diet + exercise | 14 | 12.8 (5.7–17.1) * | 24.9 (20.6–30.9) * | NA | 56 (30–84) *  | 87 (33–177) *  | 167 (75–222) *  | NA | NA | 83 (74–99) *   | 9.2 (3.5–18) *     | 2.10 (0.67–4.22) * | 44 (20–127) * | 71 (14–192) *  | 4 (2–7) * | 2 (1–3) * | 0 (0–1) * | 0 (0–2) * | 1 (0–2) * | 0 (0–2) * |    |
|                                             | placebo                | 28 | —                 | —          | low-calorie diet + exercise                            | 23 | 11.7 (6.2–18.8) * | 26.8 (20.1–31.4) * | NA | 61 (40–101) * | 89 (28–145) *  | 156 (111–180) * | NA | NA | 87 (70–130) *  | 12.8 (5.20–30.7) * | 2.68 (1.02–6.66) * | 49 (21–87) *  | 63 (14–126) *  | 4 (2–7) * | 1 (1–3) * | 1 (0–2) * | 1 (0–1) * | 1 (0–2) * | 1 (0–2) * |    |
| <b>Nobili et al. 2006 [Italy]</b>           | vitamin E              | 45 | 600 IU            | Once daily | vitamin C 500 mg/day                                   | 15 | 12.07 ± 3.29      | 26.49 ± 3.57       | NA | 64.50 ± 16.47 | 80.24 ± 3.08   | 152.76 ± 34.18  | NA | NA | 86.03 ± 12.47  | 13.14 ± 6.72       | 2.82 ± 1.48        | 45.21 ± 17.28 | 68.53 ± 33.34  | NA        | NA        | NA        | NA        | NA        | NA        |    |
|                                             | placebo                | 43 | —                 | —          | diet + exercise                                        | 13 | 12.36 ± 3.02      | 25.46 ± 3.60       | NA | 59.84 ± 17.79 | 87.53 ± 52.01  | 154.39 ± 37.39  | NA | NA | 77.30 ± 9.19   | 11.05 ± 5.34       | 2.11 ± 1.09        | 41.22 ± 12.30 | 57.11 ± 23.63  | NA        | NA        | NA        | NA        | NA        | NA        |    |
| <b>Dufour et al. 2006 [Switzerland]</b>     | vitamin E              | 15 | 400 IU            | twice day  | UDCA 12–15 mg/kg/day                                   | 10 | 46 ± 14           | 31 ± 7             | NA | 90 ± 7        | NA             | NA              | NA | NA | NA             | NA                 | NA                 | 66 ± 36       | 88 ± 42        | 5.8 ± 2.0 | 2.6 ± 1.1 | 1.8 ± 1.1 | 1.8 ± 1.5 | 1.4 ± 1.0 | 2.0 ± 1.5 |    |
|                                             | placebo                | 15 | —                 | —          | None                                                   | 8  | 44 ± 14           | 30 ± 5             | NA | 83 ± 4        | NA             | NA              | NA | NA | NA             | NA                 | NA                 | 50 ± 14       | 76 ± 43        | 6.0 ± 1.2 | 3.0 ± 0.7 | 1.8 ± 1.0 | 1.0 ± 1.0 | 1.2 ± 0.6 | 0.9 ± 1.2 |    |
|                                             | UDCA                   | 18 | 12–15 mg/kg       | Once daily | placebo                                                | 13 | 47 ± 12           | 30 ± 4             | NA | 89 ± 4        | NA             | NA              | NA | NA | NA             | NA                 | NA                 | 63 ± 38       | 112 ± 64       | 6.1 ± 1.6 | 2.9 ± 0.8 | 1.6 ± 0.9 | 1.4 ± 1.3 | 1.5 ± 0.9 | 1.8 ± 1.3 |    |
| <b>Vajro et al. 2004 [Italy]</b>            | vitamin E              | 14 | 600 IU × 2 months | Once daily | diet                                                   | 10 | 10.7 ± 3.45       | 24.50 ± 2.78       | NA | NA            | NA             | 4.00 ± 1.03 **  | NA | NA | NA             | NA                 | NA                 | NA            | 72.58 ± 17.46  | NA        | NA        | NA        | NA        | NA        | NA        |    |
|                                             | 150 IU × 3 months      |    | Once daily        |            |                                                        |    |                   |                    |    |               |                |                 |    |    |                |                    |                    |               |                |           |           |           |           |           |           |    |
| placebo                                     | 14                     | —  | —                 | —          | diet                                                   | 11 | 9.88 ± 3.97       | 24.82 ± 2.35       | NA | NA            | NA             | 4.01 ± 1.05 **  | NA | NA | NA             | NA                 | NA                 | 76.00 ± 23.45 | NA             | NA        | NA        | NA        | NA        | NA        | NA        | NA |
| <b>Harrison et al. 2003 [United States]</b> | vitamin E              | 23 | 1000 IU           | Once daily | vitamin C 1000 mg/day + Diet + exercise                | 9  | 52.5              | 34.7               | NA | NA            | 206.9          | 202.2           | NA | NA | 126            | NA                 | NA                 | 63.2          | 92.3           | NA        | NA        | NA        | 1.8       | NA        | NA        |    |
|                                             | placebo                | 22 | —                 | —          | Diet + exercise                                        | 11 | 50.2              | 30.8               | NA | NA            | 227.5          | 212.7           | NA | NA | 124            | NA                 | NA                 | 80.2          | 109            | NA        | NA        | NA        | 1.        | NA        | NA        |    |

Abbreviations: **BMI** = body mass index; **WC** = Waist circumference; **TG** = Triglycerides; **TC** = Total cholesterol ; **HDL** = High-density lipoprotein; **LDL** = Low-density lipoprotein; **FBS** = Fasting Blood Sugar; **FPI** = Fasting Plasma Insulin; **HOMA-IR** = homeostatic model assessment- insulin resistance; **AST** = Aspartate aminotransferase; **ALT** = Alanine aminotransferase; **NAS** = NAFLD activity score  
\*: median (range); \*\*: mmol/L
